# Supplementary material
Source: PubMed Central journal article supplement (PMC4016704)

## ***ngsTools*: methods for population genetics analyses from Next-Generation Sequencing data**

Matteo Fumagalli (1)\*, Filipe G. Vieira (1)\*<sup>§</sup>, Tyler Linderoth (1), and Rasmus Nielsen (1,2,3)

(1) Department of Integrative Biology, University of California, Berkeley, USA

(2) Department of Statistics, University of California, Berkeley, USA

(3) Department of Biology, University of Copenhagen, Copenhagen, Denmark

\* These authors contribute equally

<sup>§</sup> Current address: Centro de Investigação em Biodiversidade e Recursos Genéticos (CIBIO), Universidade do Porto, Vairão, Portugal

Contact: [mfumagalli82@gmail.com](mailto:mfumagalli82@gmail.com)

### **Supplementary Material**

#### **Supplementary Figures**

##### **Supplementary Figure 1. PCA plots of 161 wild rice accessions.**

Individuals are colored according to four geographical regions: India (IND, green), China (CHI, red), South East Asia (SEA, purple) and Oceania (OCE, cyan). The first principal component separates the 2 rice species (panel A), while the others separate different ecotypes (panel B). The proportion of genetic variance explained by each component is also shown in parenthesis.

Panel A

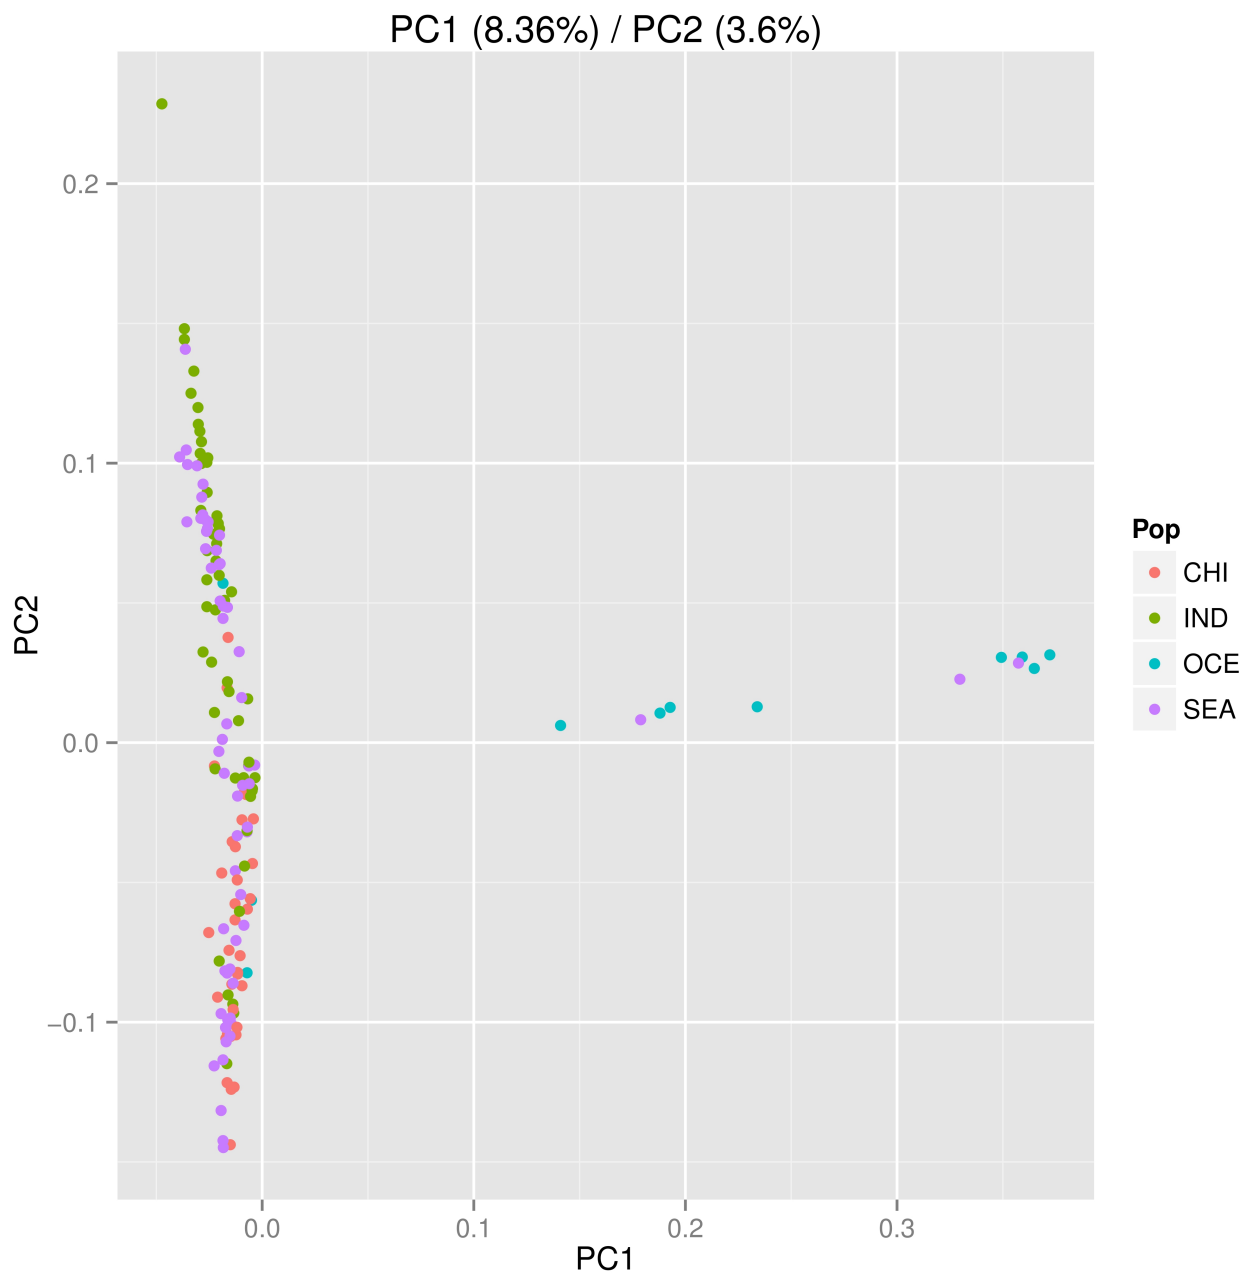

Panel B

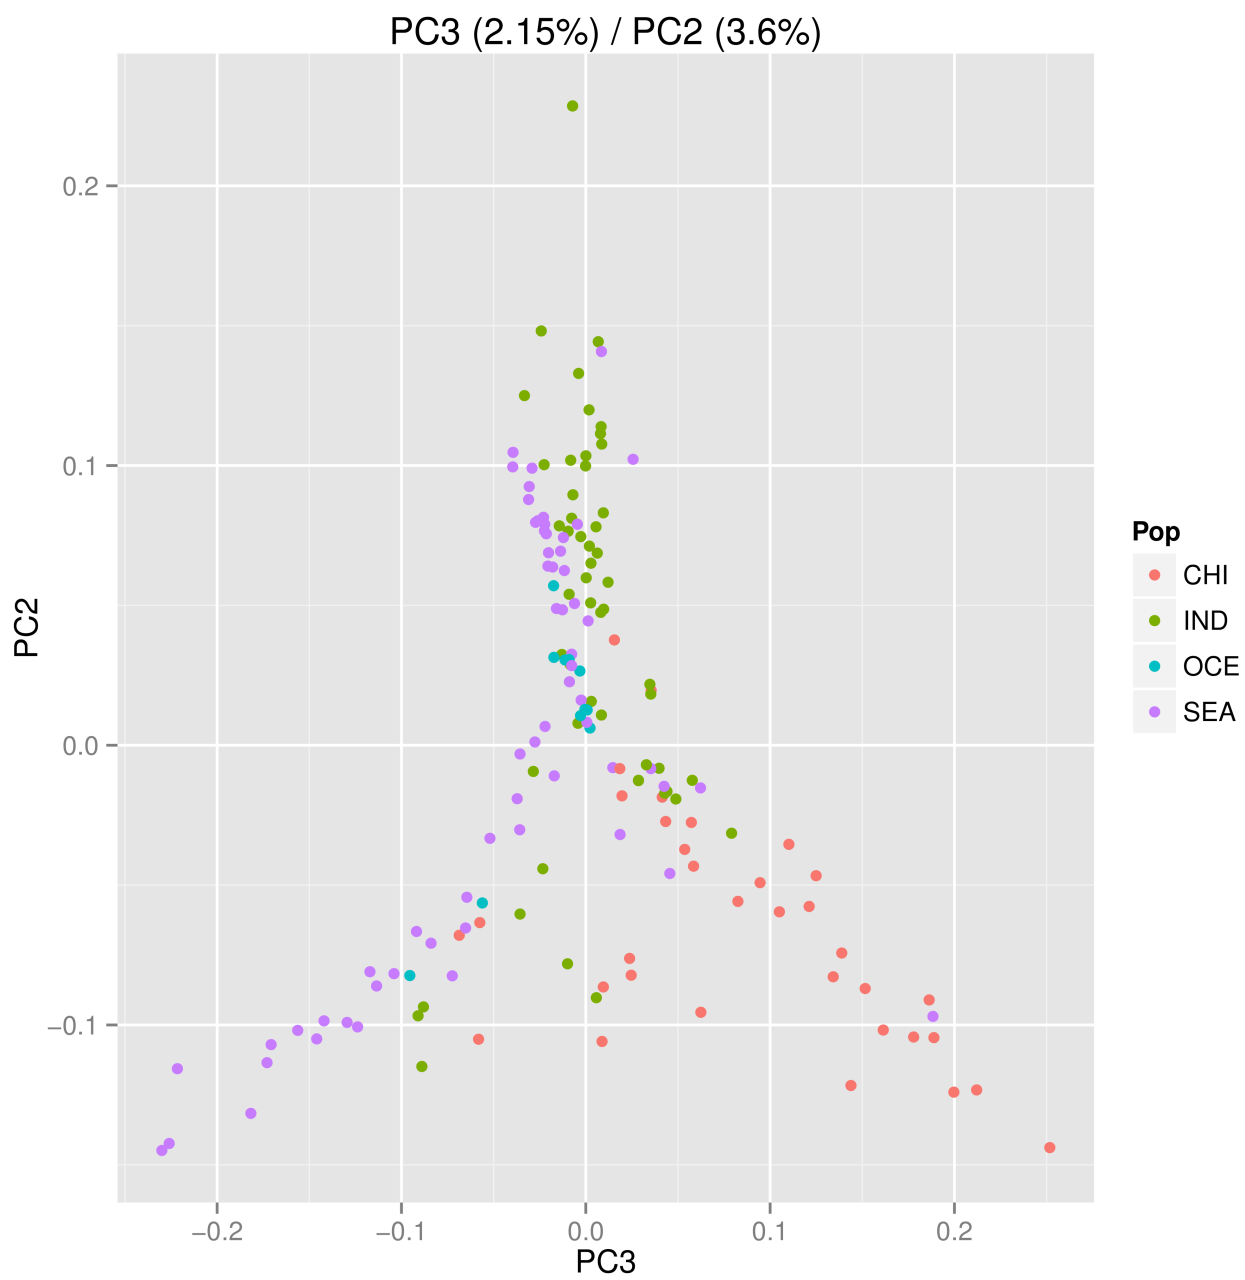

Supplement: supp_btu041_supp_mat.pdf [file supp_btu041_supp_mat.pdf]
